# Supplementary material for: New Insights into the Genome Organization of Yeast Killer Viruses Based on “Atypical” Killer Strains Characterized by High-Throughput Sequencing
Source: MDPI journal article supplement (doi:10.3390/toxins9090292), 2017-09-19
Supplement: s1 [file s1]

# Supplementary Materials: New Insights into the Genome Organization of Yeast Killer Viruses Based on “Atypical” Killer Strains Characterized by High-Throughput Sequencing

Manuel Ramírez, Rocío Velázquez, Antonio López-Piñeiro, Belén Naranjo, Francisco Roig and Carlos Llorens

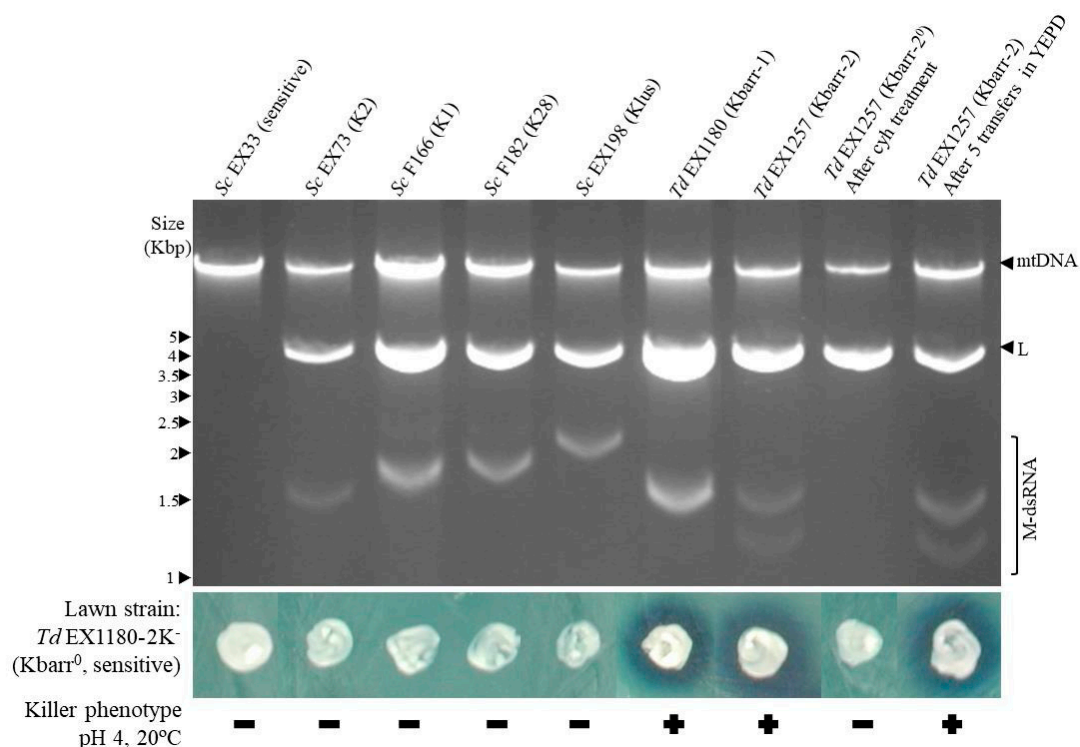

**Figure S1.** Attempt to cure Mbarr-2 killer virus with cycloheximide. Agarose gel electrophoresis of total nucleic acids from sensitive (EX33) and killer K2 (EX73), K1 (F166), K28 (F182), Klus (EX198), Kbarr-1 (EX1180), Kbarr-2 (EX1257), Kbarr-2<sup>0</sup> (EX1257 after cycloheximide treatment), and Kbarr-2 (EX1257 Kbarr-2<sup>0</sup> after cycloheximide treatment and 5 transfers in YEPD plates) strains (top panel). The killer phenotype assay is shown (bottom panel). EX1180-2K<sup>-</sup> is a cycloheximide-cured clone from EX1180. The assay was done on methylene blue agar plates (pH 4, 20 °C) seeded with *T. delbrueckii* EX1180-2K<sup>-</sup> strain.
